# Supplementary material
Source: publisher figshare collection journal article supplement (https://sage.figshare.com/ndownloader/files/22936172)
Supplement: Supplementary file 1 [file 22936172]

**Supplementary table 2:** Structure of social networks of severely mentally ill service users according to the length of time since first contact with psychiatry. Morpheus Study. Belgium 2014–2015 (n=380).

|                                                 | Length of time since first contact with psychiatry |                        |                    | F value |
|-------------------------------------------------|----------------------------------------------------|------------------------|--------------------|---------|
|                                                 | Less than 5 years                                  | Between 5 and 15 years | More than 15 years |         |
| Size and composition measures                   |                                                    |                        |                    |         |
| Support persons (no.) (i.e. network size)       | 11.2                                               | 12.8                   | 12.2               | 3.1 *   |
| Professionals (no.)                             | 7.0                                                | 7.6                    | 7.9                | 2.4     |
| Mental health services (no.)                    | 5.4                                                | 6.4                    | 6.2                | 4.9     |
| Health services (no.)                           | 0.9                                                | 0.8                    | 1.1                | 2.7     |
| Social services (no.)                           | 0.9                                                | 0.8                    | 1.0                | 0.4     |
| Justice (no.)                                   | 0.1                                                | 0.1                    | 0.1                | 1.8     |
| Generic services (no.)                          | 0.3                                                | 0.2                    | 0.2                | 1.2     |
| Non-professionals (no.)                         | 4.2                                                | 5.1                    | 4.5                | 2.4     |
| Family members (no.)                            | 2.9                                                | 3.2                    | 2.9                | 4.0 *   |
| Friends (no.)                                   | 1.2                                                | 1.4                    | 1.2                | 1.3     |
| Diversity of professional services (no.)        | 3.9                                                | 3.7                    | 4.0                | 0.7     |
| Diversity of professional functions (no.)       | 5.6                                                | 5.8                    | 6.0                | 1.6     |
| Diversity of types of alters <sup>1</sup> (no.) | 3.3                                                | 3.3                    | 3.5                | 1.3     |
| Cohesion measures                               |                                                    |                        |                    |         |
| Density (%)                                     | 0.2                                                | 0.2                    | 0.2                | 0.7     |
| Fragmentation (%)                               | 0.6                                                | 0.6                    | 0.7                | 0.9     |
| Components (no.)                                | 5.2                                                | 5.2                    | 5.6                | 0.5     |
| Components (excluding isolates) (no.)           | 1.6                                                | 2                      | 1.8                | 5.2**   |
| Cliques of maximum size (no.)                   | 1.5                                                | 1.7                    | 1.7                | 0.6     |
| Isolates (no.)                                  | 3.6                                                | 3.3                    | 3.7                | 0.9     |

|                                                                             |      |      |      |     |
|-----------------------------------------------------------------------------|------|------|------|-----|
| Size of the largest component (no.)                                         | 6    | 6.8  | 6.4  | 1.4 |
| Alters in largest component (%)                                             | 0.5  | 0.5  | 0.5  | 1   |
| Size of the largest clique (no.)                                            | 4.0  | 4.8  | 4.4  | 3.2 |
| Average size of component (no.)                                             | 2.9  | 3.2  | 2.8  | 0.8 |
| Degree centralization (%)                                                   | 0.2  | 0.2  | 0.2  | 0.6 |
| Betweenness centralization (%)                                              | 0.1  | 0.1  | 0.1  | 0.3 |
| Average degree (no.)                                                        | 2.1  | 2.5  | 2.3  | 1.5 |
| Homophily between professionals and non-professionals (ranges from -1 to 1) | -0.3 | -0.3 | -0.3 | 0.1 |
| Homophily between types of alters <sup>1</sup> (ranges from -1 to 1)        | 0.1  | 0.3  | 0.2  | 1.6 |

<sup>1</sup> The types of alters used here are: professionals from mental health services, health services, social services, justice, generic services, and non-professionals.

\*  $p < 0.05$ ; \*\*  $p < 0.01$ ; \*\*\*  $p < 0.001$
